# Supplementary material for: Annulate Lamellae biogenesis is essential for nuclear pore function
Source: Research Square preprint supplement (doi:10.21203/rs.3.rs-5104543/v1), 2024-10-09
Supplement: Supplementary file 1 [file ce91f423c59f4b4b36463187.xlsx]

## Sheet: primers
Name	Sequence
RanBP2(1-832)-F	GGCCGGATCCGAATTCATGAGGCGCAGCAAGGCT
RanBP2(1-832)-R	CGATCTCGAGGAATTTTAGCTATTTAGTTTCAACTCCTGCATT
PUC57-NUP133U-F	gacggccagtgaattCAACTGGCCAGTTTTACCAAGC
NUP133U-R	GACTCCAAGGAGCAGCGACT
NUP133U-mCherry-F	AGTCGCTGCTCCTTGGAGTCatggtgagcaagggcgagga
mCherry-R	cttgtacagctcgtccatgc
mCherry-NUP133D-F	gcatggacgagctgtacaagATGTTCCCAGCCGCC
NUP133D-PUC57-R	taccgagctcgaattTTATGAACATGGTGTGTGTTGG

## Sheet: siRNAs
Targeted gene	Sequence or Catalogue number
Non-targeting individual siRNA	5’-UAAGGCUAUGAAGAGAUAC-3’
FXR1	5’-AAACGGAAUCUGAGCGUAA-3’
UBAP2L	5'-CAACACAGCAGCACGUUAU-3'
RanBP2	5'-CACAGACAAAGCCGUUGAA-3'
Nup153	5’-GGACUUGUUAGAUCTAGUU-3’
ELYS	5’-AUUAUCUACAUAAUUGCUCUU-3’
POM121	Life Technologies 4392420
Nup214	5’-GGUGAGAAUCUUUGACUCC-3’
Nup93	Horizon ON-TARGETplus siRNA L-020767-01-0005

## Sheet: guide RNAs
Targeted gene	Targeted Sequence
Nup133	CTGTCCTAGTCGCTGCTCCT
UBAP2L-1	TGGCCAGACGGAATCCAATG
UBAP2L-2	GTGGTGGGCCACCAAGACGG
